# Supplementary material for: Confirmation of Biosimilarity in a Pharmacokinetic/Pharmacodynamic Study in Healthy Volunteers for an Analytically Highly Similar Pegfilgrastim
Source: PubMed Central journal article supplement — Clin Pharmacol Drug Dev. 2016 Jun 17;5(5):354–63. doi: 10.1002/cpdd.269 (PMC5094503; doi:10.1002/cpdd.269), 2016-06-17
Supplement: CPDD-5-354-s001.pdf [file CPDD-5-354-s001.pdf]

**Title**

**Confirmation of Biosimilarity in a Pharmacokinetic/Pharmacodynamic Study in Healthy Volunteers for an Analytically Highly Similar Pegfilgrastim**

**Authors:**

Desai, K., Preclinical and Clinical Programs, Apotex, Inc.

Catalano, T. Preclinical and Clinical Programs, Apotex, Inc.

Rai, G. Medical Consultant, Apotex, Inc.

Misra, P. Preclinical and Clinical Programs, Apotex, Inc.

Shah, N. Medical Affairs, Apobiologix\*

\* Corresponding Author

**SUPPLEMENTARY TABLES**

**Demographic Data for Subjects in Study Apo-Peg-02, Overall N= 66 (Safety Analysis Set)**

| <b>Parameter</b>               | <b>Statistics</b>         | <b>Total (N= 66)</b>  |
|--------------------------------|---------------------------|-----------------------|
| Age [years]                    | Mean ( $\pm$ SD)          | 40.05 ( $\pm$ 8.770)  |
|                                | Median                    | 41                    |
|                                | Minimum - Maximum         | 20 - 55               |
| Gender, n, (%)                 | Male                      | 49 (74.24)            |
|                                | Female                    | 17 (25.76)            |
| Race, n, (%)                   | White                     | 39 (59.09)            |
|                                | Black or African American | 7 (10.61)             |
|                                | Asian                     | 6 (9.09)              |
|                                | Other: Multi-Racial       | 7 (10.61)             |
|                                | Other: Aboriginal         | 7 (10.61)             |
| Ethnicity, n, (%)              | Hispanic or Latino        | 23 (34.85)            |
|                                | Not Hispanic or Latino    | 43 (65.15)            |
| Body Height [cm]               | Mean ( $\pm$ SD)          | 172.67 ( $\pm$ 8.128) |
|                                | Median                    | 173.25                |
|                                | Minimum - Maximum         | 150.5 - 188           |
| Body Weight [kg]               | Mean ( $\pm$ SD)          | 77.86 ( $\pm$ 9.630)  |
|                                | Median                    | 77.8                  |
|                                | Minimum - Maximum         | 61 - 96.6             |
| BMI [ $\text{kg}/\text{m}^2$ ] | Mean ( $\pm$ SD)          | 26.09 ( $\pm$ 2.421)  |
|                                | Median                    | 26.4                  |
|                                | Minimum - Maximum         | 19.7 - 29.6           |

**Most Common Adverse Events with ≥ 5% Incidence**

|                                                      |                                    | Period 1                                           |                                                  |                        | Period 2                                           |                                                  |                        | Post-Trial    |
|------------------------------------------------------|------------------------------------|----------------------------------------------------|--------------------------------------------------|------------------------|----------------------------------------------------|--------------------------------------------------|------------------------|---------------|
| System Organ Class                                   | AE Preferred Term                  | Proposed Pegfilgrastim Biosimilar (N= 33)<br>n (%) | Pegfilgrastim Reference Product (N= 33)<br>n (%) | Total (N= 66)<br>n (%) | Proposed Pegfilgrastim Biosimilar (N= 27)<br>n (%) | Pegfilgrastim Reference Product (N= 30)<br>n (%) | Total (N= 57)<br>n (%) | Total (N= 57) |
| Any AE                                               |                                    | 33 (100.0)                                         | 33 (100.0)                                       | 66 (100.0)             | 27 (100.0)                                         | 30 (100.0)                                       | 57 (100.0)             | 1 (1.75)      |
| Cardiac Disorders                                    | Palpitations                       | 3 (9.09)                                           | 2 (6.06)                                         | 5 (7.58)               |                                                    | 1 (3.33)                                         | 1 (1.75)               |               |
| Gastrointestinal Disorders                           | Nausea                             | 3 (9.09)                                           | 4 (12.12)                                        | 7 (10.61)              | 1 (3.70)                                           | 6 (20.00)                                        | 7 (12.28)              |               |
| General Disorders And Administration Site Conditions | Asthenia                           | 3 (9.09)                                           | 1 (3.03)                                         | 4 (6.06)               |                                                    |                                                  |                        |               |
|                                                      | Chest Discomfort                   | 2 (6.06)                                           | 2 (6.06)                                         | 4 (6.06)               | 1 (3.70)                                           |                                                  | 1 (1.75)               |               |
|                                                      | Chest Pain                         | 2 (6.06)                                           | 2 (6.06)                                         | 4 (6.06)               | 3 (11.11)                                          | 1 (3.33)                                         | 4 (7.02)               |               |
|                                                      | Feeling Hot                        | 3 (9.09)                                           | 4 (12.12)                                        | 7 (10.61)              | 3 (11.11)                                          | 1 (3.33)                                         | 4 (7.02)               |               |
|                                                      | Non-Cardiac Chest Pain             | 3 (9.09)                                           | 2 (6.06)                                         | 5 (7.58)               |                                                    | 1 (3.33)                                         | 1 (1.75)               |               |
| Investigations                                       | Blood Pressure Diastolic Increased | 2 (6.06)                                           | 1 (3.03)                                         | 3 (4.55)               | 2 (7.41)                                           | 2 (6.67)                                         | 4 (7.02)               |               |
|                                                      | Blood Pressure Increased           | 3 (9.09)                                           | 1 (3.03)                                         | 4 (6.06)               | 2 (7.41)                                           | 1 (3.33)                                         | 3 (5.26)               |               |
|                                                      | Blood Pressure Systolic Decreased  | 4 (12.12)                                          | 4 (12.12)                                        | 8 (12.12)              | 2 (7.41)                                           | 2 (6.67)                                         | 4 (7.02)               |               |
|                                                      | Blood Pressure Systolic Increased  | 1 (3.03)                                           | 2 (6.06)                                         | 3 (4.55)               | 3 (11.11)                                          | 6 (20.00)                                        | 9 (15.79)              |               |
|                                                      | Body Temperature Increased         | 3 (9.09)                                           | 1 (3.03)                                         | 4 (6.06)               | 1 (3.70)                                           |                                                  | 1 (1.75)               |               |
|                                                      | Heart Rate Increased               | 2 (6.06)                                           | 3 (9.09)                                         | 5 (7.58)               | 1 (3.70)                                           |                                                  | 1 (1.75)               |               |
|                                                      | Neutrophil Count Decreased         | 5 (15.15)                                          |                                                  | 5 (7.58)               |                                                    | 2 (6.67)                                         | 2 (3.51)               |               |
|                                                      | White Blood Cell Count Decreased   | 19 (57.58)                                         | 16 (48.48)                                       | 35 (53.03)             | 14 (51.85)                                         | 14 (46.67)                                       | 28 (49.12)             |               |
|                                                      | White Blood Cell Count Increased   | 33 (100.0)                                         | 33 (100.0)                                       | 66 (100.0)             | 27 (100.0)                                         | 30 (100.0)                                       | 57 (100.0)             |               |
| Musculoskeletal And Connective Tissue Disorders      | Bone Pain                          | 29 (87.88)                                         | 25 (75.76)                                       | 54 (81.82)             | 18 (66.67)                                         | 22 (73.33)                                       | 40 (70.18)             |               |

|                                                 |                            | Period 1                                           |                                                  |                        | Period 2                                           |                                                  |                        | Post-Trial    |
|-------------------------------------------------|----------------------------|----------------------------------------------------|--------------------------------------------------|------------------------|----------------------------------------------------|--------------------------------------------------|------------------------|---------------|
| System Organ Class                              | AE Preferred Term          | Proposed Pegfilgrastim Biosimilar (N= 33)<br>n (%) | Pegfilgrastim Reference Product (N= 33)<br>n (%) | Total (N= 66)<br>n (%) | Proposed Pegfilgrastim Biosimilar (N= 27)<br>n (%) | Pegfilgrastim Reference Product (N= 30)<br>n (%) | Total (N= 57)<br>n (%) | Total (N= 57) |
|                                                 | Musculo-skeletal Stiffness | 1 (3.03)                                           | 4 (12.12)                                        | 5 (7.58)               |                                                    |                                                  |                        |               |
|                                                 | Myalgia                    | 3 (9.09)                                           | 4 (12.12)                                        | 7 (10.61)              | 1 (3.70)                                           | 1 (3.33)                                         | 2 (3.51)               |               |
|                                                 | Pain In Extremity          | 2 (6.06)                                           | 2 (6.06)                                         | 4 (6.06)               |                                                    |                                                  |                        |               |
| Nervous System Disorders                        | Dizziness                  | 3 (9.09)                                           | 5 (15.15)                                        | 8 (12.12)              | 1 (3.70)                                           | 3 (10.00)                                        | 4 (7.02)               |               |
|                                                 | Headache                   | 19 (57.58)                                         | 19 (57.58)                                       | 38 (57.58)             | 10 (37.04)                                         | 17 (56.67)                                       | 27 (47.37)             |               |
| Respiratory, Thoracic And Mediastinal Disorders | Cough                      | 3 (9.09)                                           | 4 (12.12)                                        | 7 (10.61)              | 1 (3.70)                                           |                                                  | 1 (1.75)               |               |
|                                                 | Oropharyngeal Pain         | 2 (6.06)                                           | 3 (9.09)                                         | 5 (7.58)               | 1 (3.70)                                           | 4 (13.33)                                        | 5 (8.77)               |               |
| Skin And Subcutaneous Tissue Disorders          | Hyperhidrosis              | 2 (6.06)                                           | 2 (6.06)                                         | 4 (6.06)               |                                                    | 1 (3.33)                                         | 1 (1.75)               |               |
